# Supplementary material
Source: Springer Nature journal article supplement (https://www.springermedizin.de/resource/supplementary/12958_2011_963_MOESM3_ESM.pdf/9566472)
Supplement: MOESM3 [file 9566472]

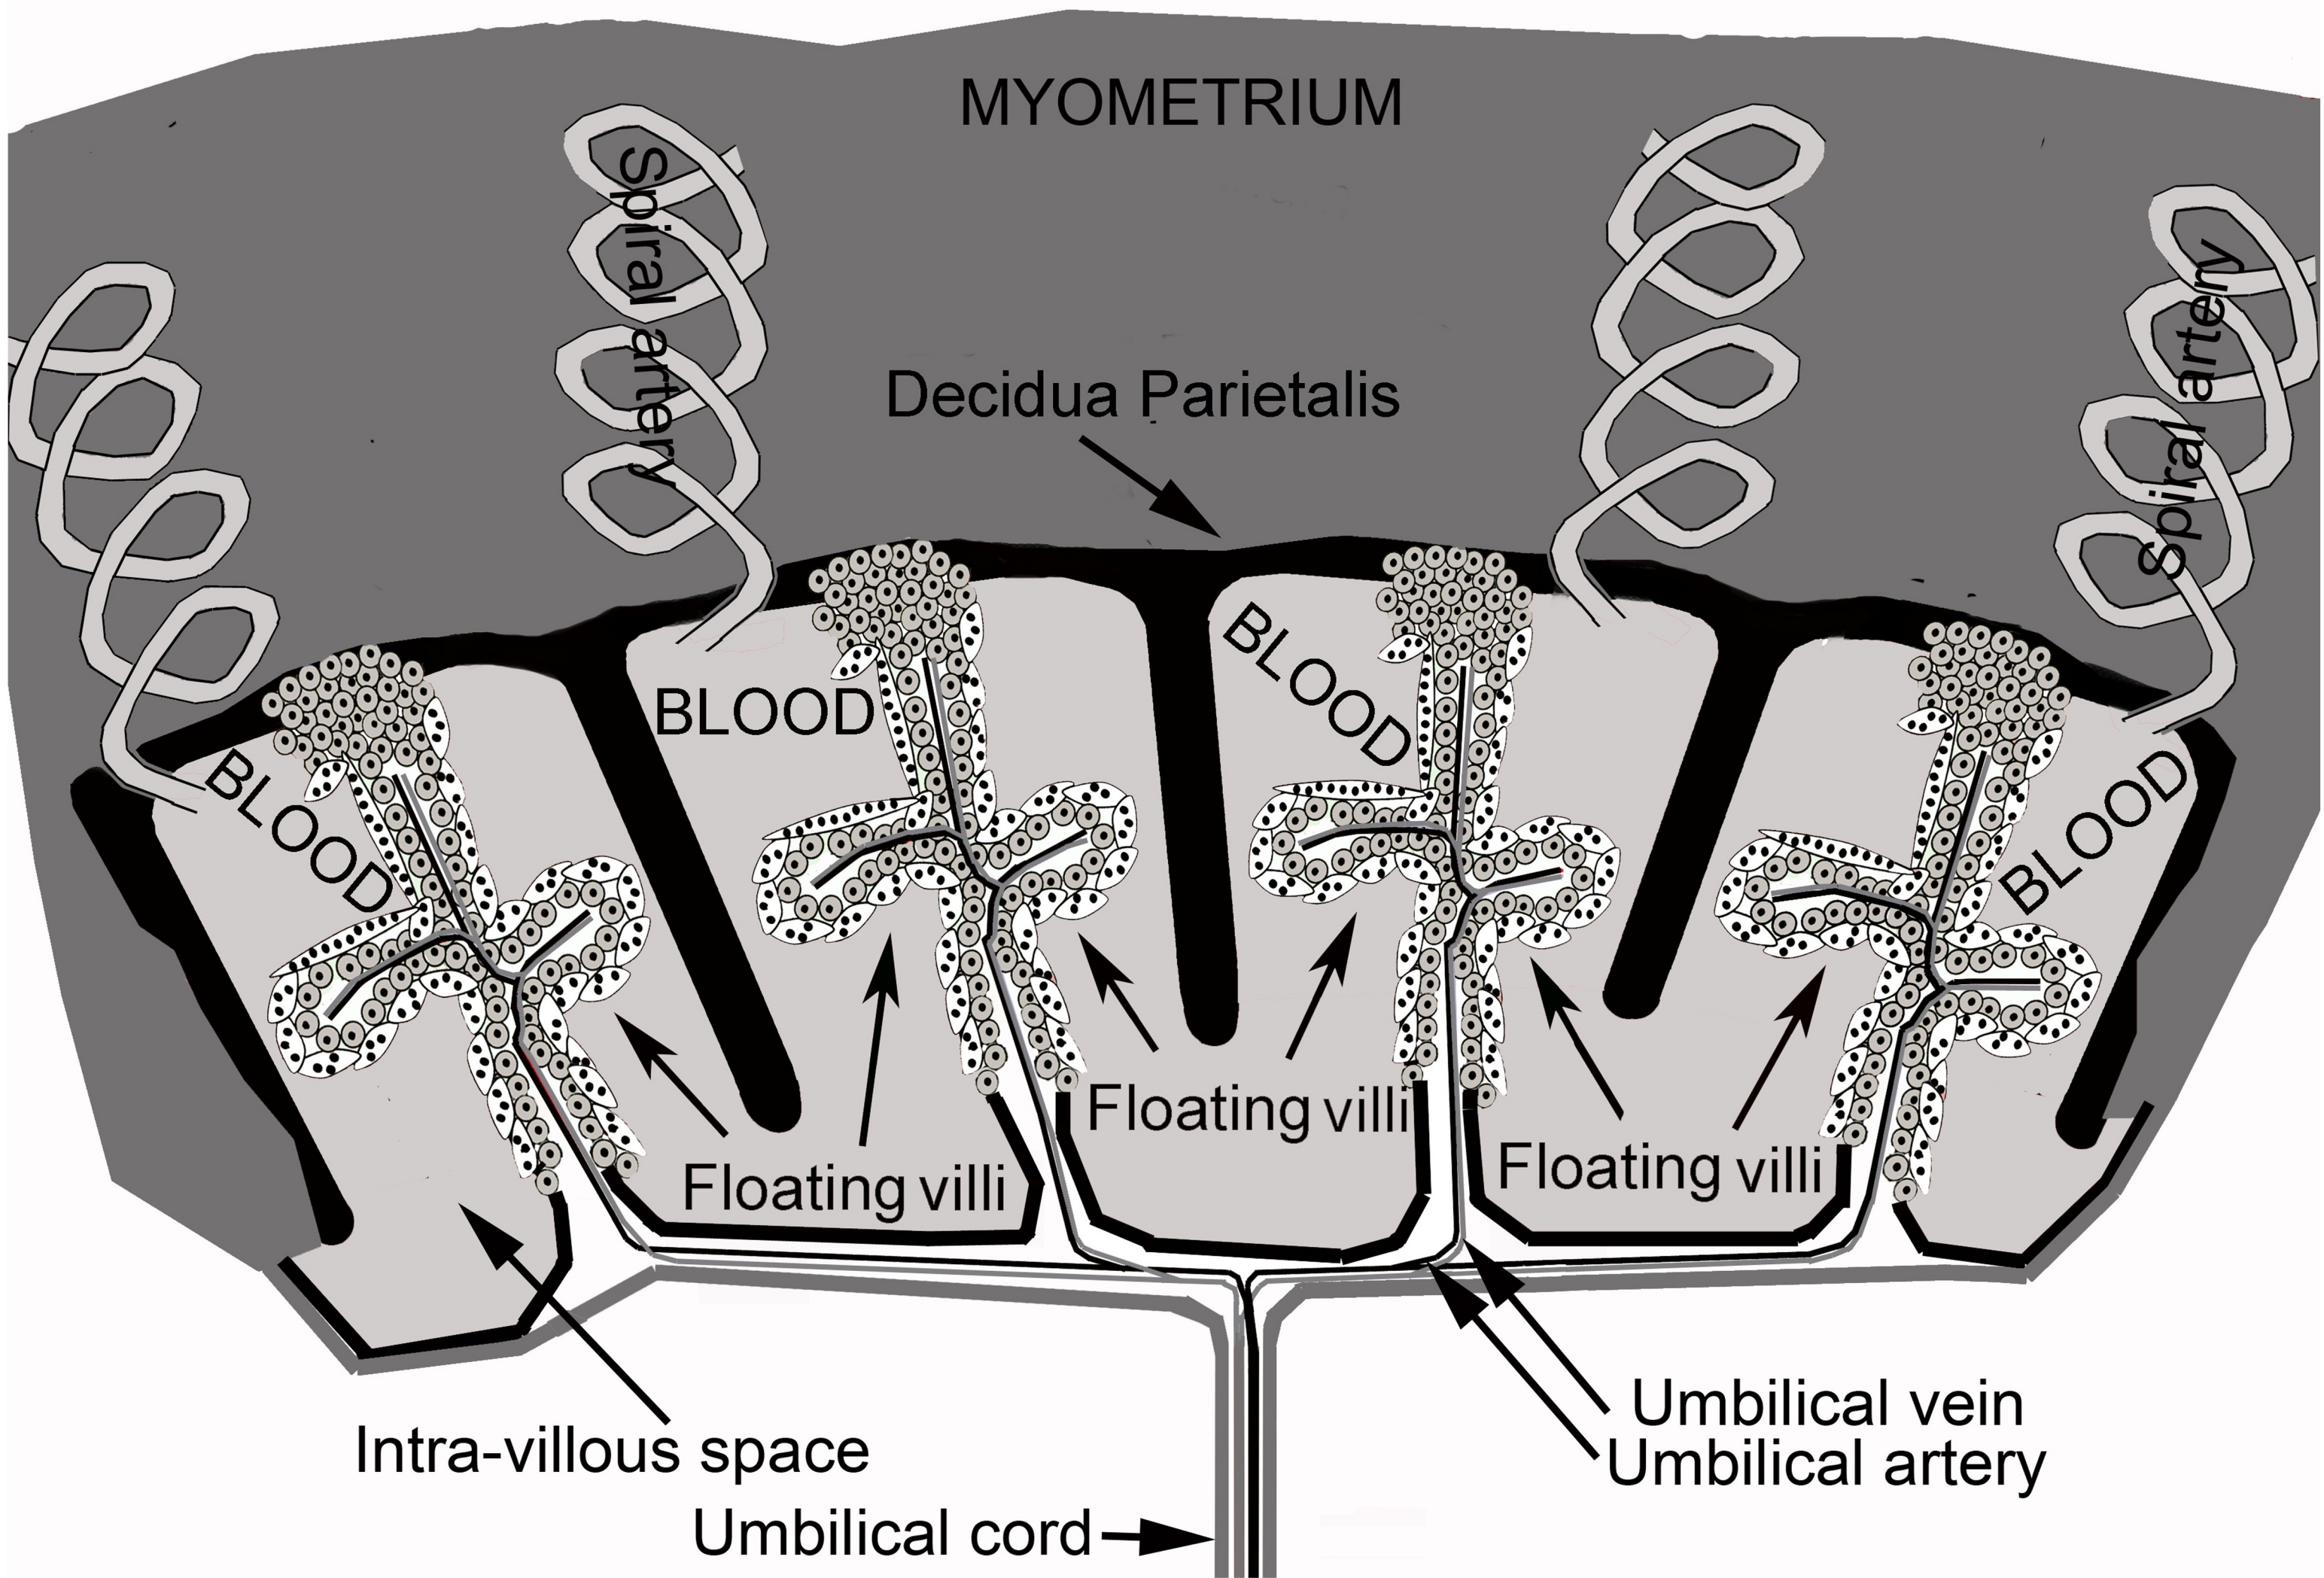

MYOMETRIUM

Decidua Parietalis

Spiral artery

Spiral artery

BLOOD

BLOOD

BLOOD

BLOOD

Floating villi

Floating villi

Floating villi

Intra-villous space

Umbilical cord

Umbilical vein  
Umbilical artery
